# Supplementary material for: Responsive calcium-derived nanoassemblies induce mitochondrial disorder to promote tumor calcification
Source: Royal Society of Chemistry journal article supplement (doi:10.1039/d3sc02945j), 2023-01-01
Supplement: d3sc02945j1.pdf [file d3sc02945j1.pdf]

Supporting Information for

## Responsive calcium-derived nanoassembly induces mitochondrial disorder to promote tumor calcification

Yan Zhao,<sup>a</sup> Xinquan Yu,<sup>b</sup> Weiheng Kong,<sup>a</sup> Rong-Mei Kong,<sup>a</sup> Ensheng Zhang,<sup>a</sup> Lian Xia,<sup>a</sup> Jing Zhang,<sup>c</sup> Fengli Qu,<sup>\*ab</sup> Weihong Tan<sup>b</sup>

<sup>a</sup>. College of Chemistry and Chemical Engineering, Qufu Normal University, Qufu, Shandong 273165, China.

<sup>b</sup>. Department of Pathology, Cancer Hospital of Zhejiang Province, Hangzhou Institute of Medicine, Chinese Academy of Sciences, Hangzhou, Zhejiang 310022, China.

<sup>c</sup>. School of Chemistry and Chemical Engineering, University of Jinan, Jinan, Shandong 250022, China.

## Experimental Section

*Materials:* L-Ascorbic acid (L-AA), CaCO<sub>3</sub>, Na<sub>2</sub>HPO<sub>4</sub>, NaH<sub>2</sub>PO<sub>4</sub> and dimethyl sulfoxide (DMSO) were purchased from Sinopharm Chemical Reagent Co., Ltd. Horseradish Peroxidase (HRP), bovine serum albumin (BSA), Trizol reagent, JC-1 staining kit and 2,2'-azino-bis(3-ethylbenzothiazoline-6-sulfonic acid) (ABTS) were purchased from Aladdin Reagents Company (Shanghai, China). 3-(4,5-Dimethylthiazol-2-yl)-2,5-diphenyltetrazolium bromide (MTT), Ca<sup>2+</sup> detection probe (Fluo-4 AM), Calcein acetoxymethyl ester (Calcein AM)-propidium iodide (PI) and 2,7-dichlorodihydrofluorescein diacetate (DCFH-DA) were purchased from Yeasen Co., Ltd. ATP assay kit was obtained from Nanjing Jiancheng Biotech Co., Ltd. Hoechst and DAPI were obtained from Sigma-Aldrich Co. (St. Louis, MO, USA). Von Kossa staining kit was purchased from Nanjing SenBeiJia Biological Technology Co., Ltd. Deionized water was generated using a Millipore Milli-Q system (Billerica, MA, USA). Deionized water was used throughout the experiments. All chemicals were analytical reagents and used without further purification.

*Characterization:* The cell pictures of schemes were created with BioRender.com. Transmission electron microscope (TEM) images were obtained from a TEM system (JEOL, JEM-2100Plus) at an accelerating voltage of 200 kV. The hydrodynamic diameter and zeta potential of the as-prepared nanoparticles were measured by dynamic laser light scattering (ZEN 3600, Malvern Instruments). Concentrations of calcium were measured by inductively coupled plasma (ICP-MS, Agilent, 8900). Cells were imaged through a

confocal laser scanning fluorescence microscope (Nikon, Ti-E+A1R MP). The MTT assay was measured using a Spectramax microplate reader (Molecular Devices, iD5). X-ray diffraction (XRD) patterns were used to acquire information on crystallography and measured on an X-ray diffractometer (D8-Advance). Fourier transform infrared spectroscopy (FT-IR) spectra were recorded on a FT-IR spectrophotometer (Bruker Vertex 70).

*Hemolysis assay:* Heparin stabilized mouse blood samples were obtained from female Balb/c mice. First, 3 mL of blood was centrifuged at 1600 rpm for 5 min, and the blood plasma and surface layer were removed. The remaining red blood cell (RBC) pellet was washed several times with 0.9% saline solution and diluted in 25 mL of PBS solution. Then, 0.5 mL of different concentrations of L-AA, CaP and CaP-AA solutions diluted in 0.9% saline were added into 1 mL of RBC suspension, respectively. Meanwhile, positive and negative control samples were prepared by adding 0.5 mL of water and 0.9% saline into 1 mL of RBC suspension, respectively. Then, the samples were incubated at room temperature for 2 h, shaking once slightly every 30 min to resuspend the RBCs. After 2 h, the samples were centrifuged at 1600 rpm, and 100  $\mu$ L of supernatants were transferred to a 96-well plate. Absorbance of hemoglobin in supernatants was measured with a microplate reader at 570 nm, and the absorbance at 655 nm was recorded as the reference. Hemolysis percentages of the RBCs were calculated using the following formula: Hemolysis% = (abs of sample - abs of negative control) / (abs of positive control - abs of negative control)  $\times$  100%. The percent hemolysis values were calculated from three separate experiments.

*Statistical analysis:* All data are presented as the mean  $\pm$  SD. Unless stated otherwise, the experiments were performed in triplicate. The significance of the difference was determined through one-way analysis of variance (ANOVA) by \* $p < 0.05$ , \*\* $p < 0.01$ , \*\*\* $p < 0.001$ , <sup>ns</sup>  $p \geq 0.05$ .

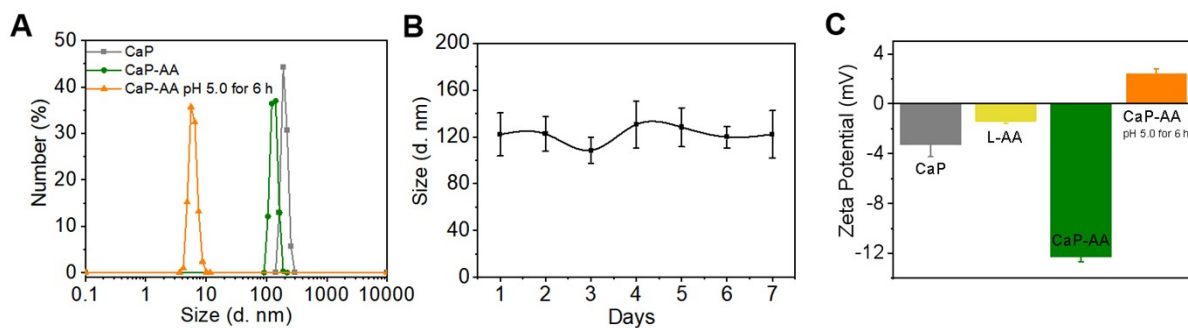

**Fig. S1.** (A) DLS spectra of corresponding NPs treated under different conditions. (B) DLS data of CaP-AA incubated in serum for various days. (C) Zeta potential of as-prepared NPs.

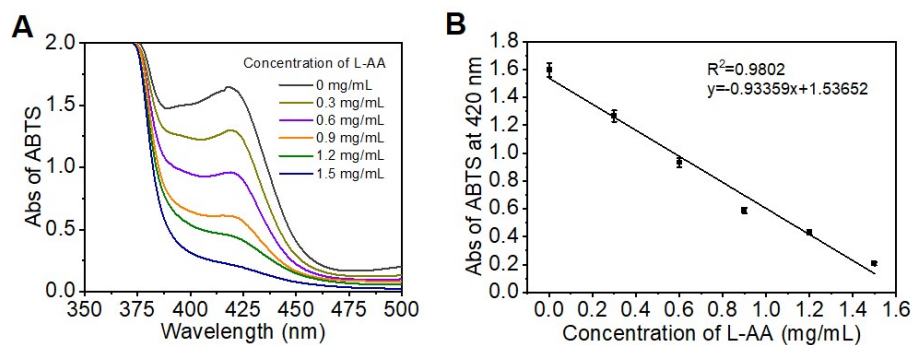

**Fig. S2.** (A) The Abs changes of ABTS with the addition of different concentrations of L-AA. (B) The corresponding linear trend of A.

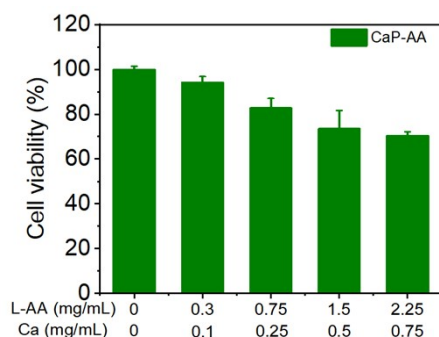

**Fig. S3.** Cell viability of 293T cells incubated with CaP-AA (quantified by Ca and L-AA, respectively).

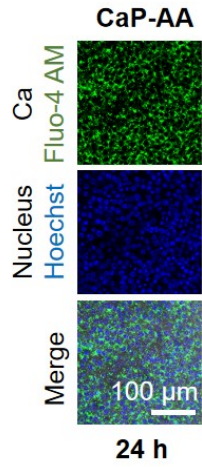

**Fig. S4.** Calcium generation in 4T1 cells after 24 h incubation with CaP-AA.

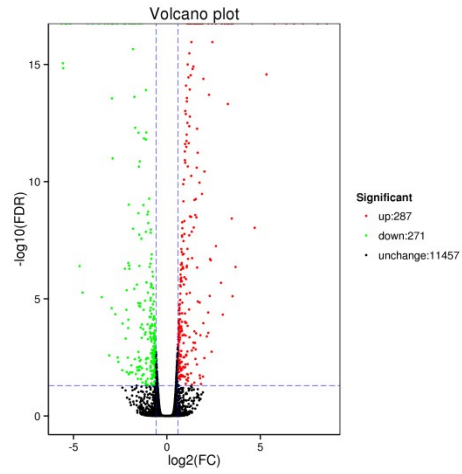

**Fig. S5.** Volcano plot of 4T1 cells differentially expressed genes after CaP-AA treatment.

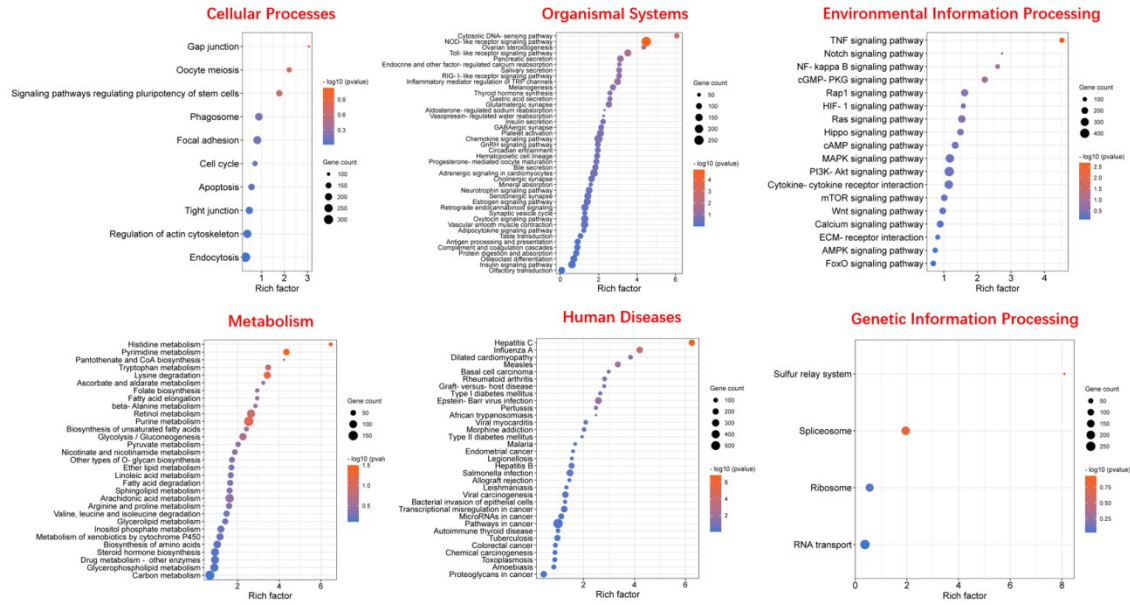

**Fig. S6.** Classification statistics of KEGG pathway enrichment analysis for differentially expressed genes of 4T1 cells after CaP-AA treatment.

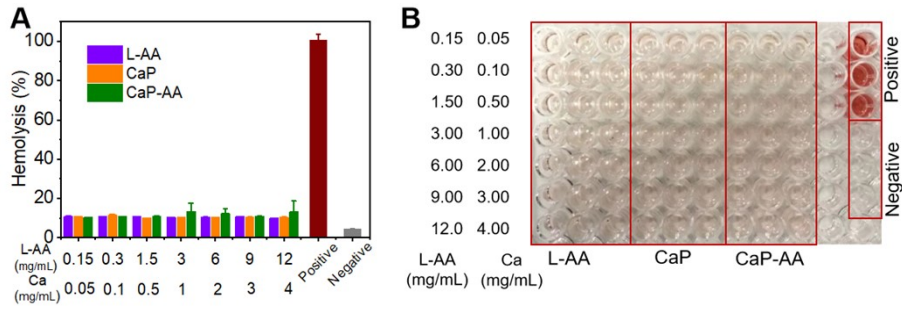

**Fig. S7.** (A) Hemolysis tests of different concentrations of L-AA, CaP and CaP-AA. (B) Corresponding hemolysis graph of (A).

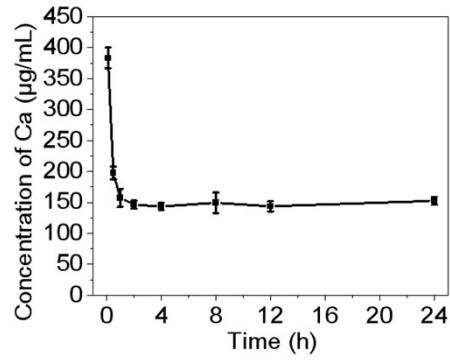

**Fig. S8.** Pharmacokinetics profile of CaP-AA.

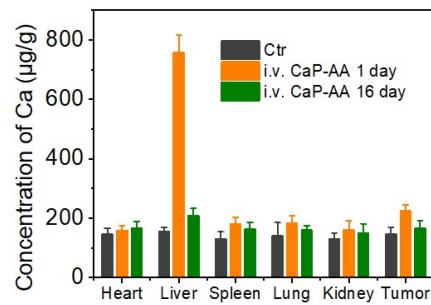

**Fig. S9.** Quantitative determination of CaP-AA based on ICP-MS (Ca) in different organs at 1 day / 16 days post-intravenous injection.

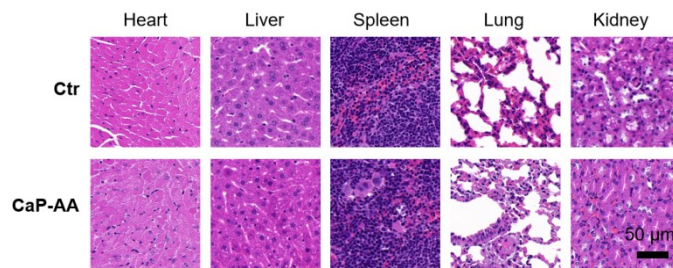

**Fig. S10.** H&E-stained organ slices at 16 days post-intratumoral injection of corresponding treatment groups.



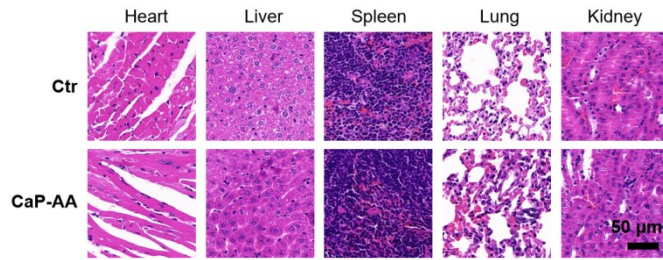

**Fig. S11.** H&E-stained organ slices at 16 days post-intravenous injection of corresponding treatments.

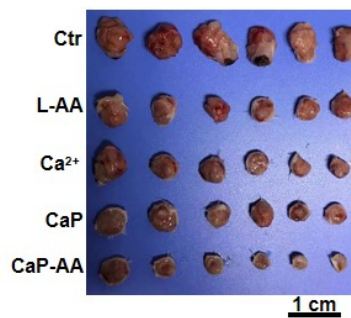

**Fig. S12.** Images of excised tumors after sacrificing the mice at 16 days post- intratumoral injection.

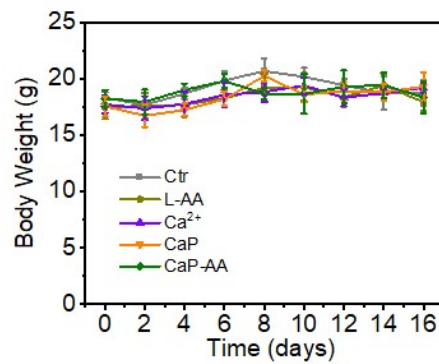

**Fig. S13.** Average bodyweight curves of mice from different groups recorded after different intratumoral injection treatments.

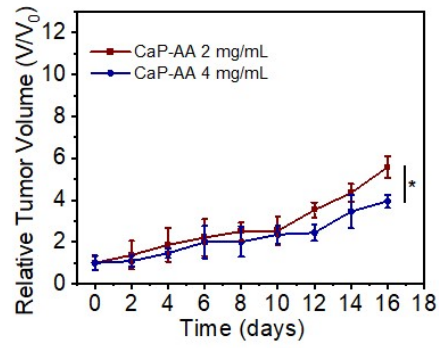

**Fig. S14.** Tumor growth curves after intravenous injection in different treatment groups.

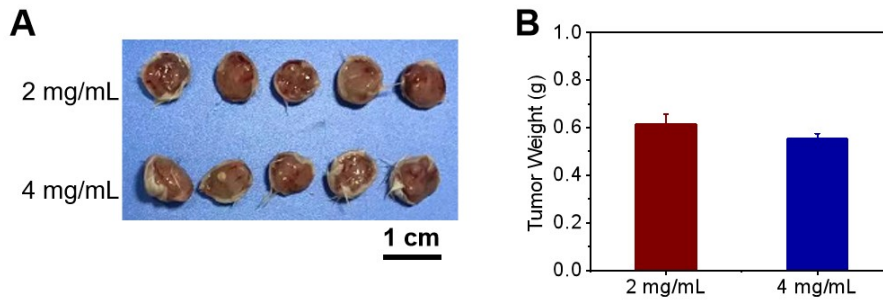

**Fig. S15.** (A) Images of excised tumors after sacrificing mice at 16 days post- intravenous injection treatment. (B) Average tumor weights of A.

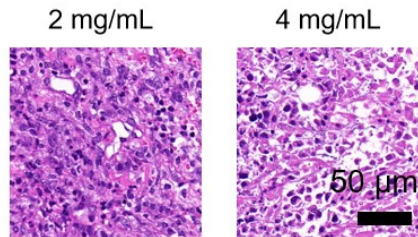

**Fig. S16.** H&E-stained tumor slices after sacrificing mice at 16 days post-intravenous injection of CaP-AA.

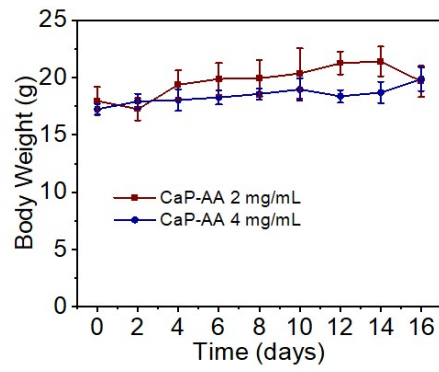

**Fig. S17.** Average bodyweight curves of mice recorded after different intravenous injection treatments.

**Table S1.** Complete blood tests of control mice and mice 24 h after intravenous injection of CaP-AA at the therapeutic dose (WBC: white blood cells; Lymph: lymphocyte; Mon: monocytes; Gran: granulocyte; RBC: red blood cell; HGB: hemoglobin; HCT: hematocrit; MCV: Mean Corpuscular Volume; MCH: Mean Corpuscular Hemoglobin; MCHC: Mean Corpuscular Hemoglobin Concentration; RDW: red cell distribution width; PLT: Platelets; WPV: mean platelet volume; PWD: platelet distribution width; PCT: thrombocytocrit). Reference range of mouse parameters was provided by Wuhan Servicebio Technology CO., LTD.

| Parameter | Ctr   |       |       | CaP-AA |       |       | Unit                | Reference range |
|-----------|-------|-------|-------|--------|-------|-------|---------------------|-----------------|
| WBC       | 4.8   | 3.6   | 4.8   | 3.4    | 0.9   | 1.6   | 10 <sup>9</sup> /L  | 0.8-6.8         |
| Lymph     | 1.5   | 5.2   | 5.4   | 2.4    | 0.9   | 5.0   | 10 <sup>9</sup> /L  | 0.7-5.7         |
| Mon       | 0.3   | 0.1   | 0.1   | 0.1    | 0.2   | 0.2   | 10 <sup>9</sup> /L  | 0.0-0.3         |
| Gran      | 1.8   | 1.8   | 1.6   | 0.9    | 1.0   | 1.2   | 10 <sup>9</sup> /L  | 0.1-1.8         |
| RBC       | 9.07  | 9.00  | 8.15  | 9.64   | 8.76  | 6.59  | 10 <sup>12</sup> /L | 6.36-9.42       |
| HGB       | 141   | 110   | 112   | 143    | 121   | 143   | g/l                 | 110-143         |
| HCT       | 44.3  | 38.5  | 37.6  | 43.8   | 42.2  | 44.6  | %                   | 34.6-44.6       |
| MCV       | 50    | 52.3  | 49.6  | 48.5   | 49.5  | 58.1  | fl                  | 48.2-58.3       |
| MCH       | 16.2  | 19    | 18.2  | 15.9   | 15.9  | 16.0  | pg                  | 15.8-19         |
| MCHC      | 324   | 313   | 305   | 335    | 352   | 350   | g/l                 | 302-353         |
| RDW       | 14.1  | 17    | 16.3  | 13.5   | 16.5  | 16.0  | %                   | 13-17           |
| PLT       | 963   | 1550  | 1059  | 918    | 1590  | 1432  | 10 <sup>9</sup> /L  | 450-1590        |
| MPV       | 6.0   | 5.7   | 5.9   | 5.5    | 5.9   | 5.9   | fl                  | 3.8-6.0         |
| PDW       | 17.3  | 19.3  | 18.6  | 16.4   | 17.1  | 17.4  |                     |                 |
| PCT       | 0.221 | 0.175 | 0.132 | 0.206  | 0.168 | 0.217 | %                   |                 |

**Table S2.** Blood biochemical parameters of control mice and mice 24 h after intravenous injection of CaP-AA (4 mg/mL, 200  $\mu$ L) (ALT: aminotransferase; AST: aspartate aminotransferase; DBIL: Direct Bilirubin; TBIL: total bilirubin; ALB: Serum albumin; ALP: alkaline phosphatase; BUN: nephric blood urea nitrogen; CR: creatinine; UA: uric acid). Reference range of mouse parameters was provided by Wuhan Servicebio Technology CO., LTD.

| <b>Parameter</b> | <b>Ctr</b> |         |         | <b>CaP-AA</b> |         |         | <b>Unit</b> | <b>Reference range</b> |
|------------------|------------|---------|---------|---------------|---------|---------|-------------|------------------------|
| ALT              | 78.894     | 68.943  | 71.189  | 73.681        | 26.847  | 68.284  | U/L         | 10.06-96.47            |
| AST              | 132.714    | 175.869 | 164.843 | 116.18        | 176.529 | 132.895 | U/L         | 36.31-235.48           |
| DBIL             | 28.47      | 0.4966  | 1.8631  | 20.388        | 26.849  | 33.121  | $\mu$ mol/L | 0.45-33.89             |
| TBIL             | 41.007     | 13.846  | 19.864  | 35.577        | 20.846  | 50.005  | $\mu$ mol/L | 6.09-53.06             |
| ALB              | 20.496     | 23.596  | 28.763  | 38.626        | 29.562  | 35.763  | g/L         | 21.22-39.15            |
| ALP              | 236.052    | 385.754 | 463.859 | 224.914       | 329.658 | 423.685 | U/L         | 22.52-474.35           |
| BUN              | 33.616     | 19.547  | 19.749  | 31.656        | 31.874  | 34.586  | mg/dL       | 10.81-34.74            |
| CR               | 76.656     | 26.745  | 96.746  | 46.483        | 79.324  | 46.833  | $\mu$ mol/L | 10.91-85.09            |
| UA               | 128.469    | 224.869 | 195.854 | 217.704       | 129.852 | 97.297  | $\mu$ mol/L | 44.42-224.77           |
